# Supplementary material
Source: Springer Nature journal article supplement (https://www.springermedizin.de/resource/supplementary/12875_2012_710_MOESM1_ESM.pdf/9435206)

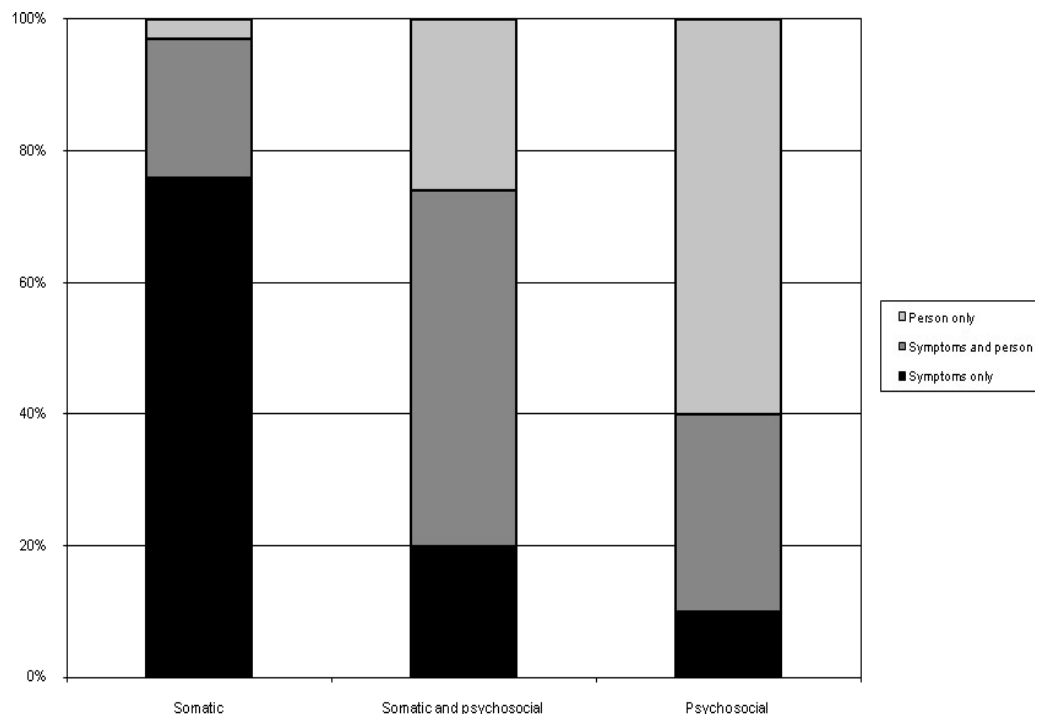



Supplement: MOESM1 [file 9435206]
